# Supplementary material for: Forecasting Japan's Physician Shortage in 2035 as the First Full-Fledged Aged Society
Source: PLoS One. 2012 Nov 30;7(11):e50410. doi: 10.1371/journal.pone.0050410 (PMC3511523; doi:10.1371/journal.pone.0050410)
Supplement: Table S1 — Numbers of fatalities per practicing physician working hour in 2010 and 2035. (XLS) [file pone.0050410.s003.xls]

## Sheet: Sheet1
Table S1
	2010	2035
	fatalities/working hrs	fatalities/working hrs
		current working hrs		limited to 60 hrs / wk		limited to 48 hrs /wk
		indicator	increase rate	indicator	increase rate	indicator	increase rate
Japan (47 prefectures)	0.128	0.138	0.08	0.162	0.27	0.196	0.53
Hokkaido	0.133	0.148	0.11	0.173	0.3	0.21	0.58
Tohoku	0.175	0.175	0	0.206	0.17	0.249	0.42
Aomori	0.196	0.211	0.08	0.247	0.26	0.299	0.53
Iwate	0.194	0.186	-0.04	0.218	0.13	0.264	0.36
Miyagi	0.131	0.145	0.11	0.17	0.31	0.206	0.58
Akita	0.189	0.165	-0.13	0.194	0.03	0.235	0.24
Yamagata	0.18	0.157	-0.13	0.185	0.03	0.224	0.24
Fukushima	0.179	0.184	0.03	0.215	0.2	0.261	0.45
Niigata	0.191	0.197	0.03	0.23	0.2	0.278	0.45
Kanto	0.118	0.136	0.16	0.161	0.37	0.194	0.65
Ibaraki	0.18	0.206	0.14	0.243	0.35	0.294	0.63
Tochigi	0.137	0.129	-0.06	0.152	0.11	0.184	0.34
Gunma	0.149	0.163	0.1	0.191	0.29	0.231	0.55
Saitama	0.158	0.221	0.4	0.258	0.64	0.311	0.97
Chiba	0.143	0.186	0.3	0.219	0.53	0.264	0.85
Tokyo	0.086	0.091	0.05	0.107	0.25	0.129	0.5
Kanagawa	0.118	0.147	0.25	0.173	0.47	0.209	0.78
Hokuriku	0.131	0.127	-0.03	0.15	0.14	0.181	0.38
Toyama	0.143	0.144	0.01	0.169	0.18	0.203	0.42
Ishikawa	0.116	0.117	0.01	0.139	0.2	0.168	0.45
Fukui	0.139	0.122	-0.12	0.143	0.03	0.173	0.25
Chubu (except Hokuriku)	0.141	0.155	0.1	0.183	0.3	0.221	0.57
Yamanashi	0.147	0.139	-0.05	0.162	0.1	0.196	0.33
Nagano	0.163	0.163	0	0.191	0.17	0.231	0.41
Gifu	0.16	0.173	0.08	0.204	0.27	0.246	0.54
Shizuoka	0.152	0.168	0.1	0.198	0.3	0.239	0.57
Aichi	0.123	0.145	0.18	0.172	0.39	0.207	0.68
Kinki	0.117	0.13	0.12	0.154	0.32	0.186	0.59
Mie	0.16	0.172	0.08	0.201	0.26	0.243	0.52
Shiga	0.119	0.131	0.11	0.154	0.3	0.187	0.57
Kyoto	0.097	0.098	0.01	0.116	0.2	0.141	0.45
Osaka	0.105	0.123	0.17	0.145	0.38	0.175	0.67
Hyogo	0.131	0.151	0.15	0.177	0.35	0.213	0.63
Nara	0.128	0.149	0.16	0.175	0.36	0.212	0.65
Wakayama	0.137	0.131	-0.04	0.154	0.12	0.187	0.36
Chugoku	0.132	0.133	0.01	0.156	0.19	0.189	0.43
Tottori	0.128	0.115	-0.1	0.136	0.06	0.164	0.28
Shimane	0.149	0.125	-0.16	0.146	-0.02	0.177	0.19
Okayama	0.115	0.119	0.04	0.141	0.22	0.17	0.48
Hiroshima	0.129	0.142	0.1	0.166	0.29	0.201	0.56
Yamaguchi	0.156	0.152	-0.03	0.177	0.14	0.214	0.38
Shikoku	0.136	0.133	-0.02	0.155	0.14	0.187	0.38
Tokushima	0.126	0.128	0.01	0.15	0.19	0.18	0.43
Kagawa	0.132	0.135	0.02	0.158	0.2	0.19	0.44
Ehime	0.144	0.143	-0.01	0.167	0.16	0.201	0.4
Kochi	0.138	0.121	-0.13	0.14	0.02	0.169	0.23
Kyusyu/Okinawa	0.119	0.118	-0.01	0.138	0.16	0.167	0.4
Fukuoka	0.1	0.102	0.03	0.121	0.21	0.146	0.46
Saga	0.131	0.115	-0.12	0.135	0.03	0.163	0.25
Nagasaki	0.126	0.132	0.05	0.154	0.23	0.186	0.48
Kumamoto	0.131	0.132	0.01	0.154	0.18	0.187	0.43
Oita	0.139	0.13	-0.06	0.151	0.09	0.183	0.32
Miyazaki	0.145	0.149	0.02	0.172	0.18	0.208	0.43
Kagoshima	0.157	0.144	-0.08	0.167	0.06	0.201	0.28
Okinawa	0.09	0.099	0.1	0.117	0.3	0.141	0.57

## Sheet: Sheet2
愛知 0.123 0.145 18% 0.172 39% 0.207 68%
